# Supplementary material
Source: publisher figshare collection journal article supplement (https://springernature.figshare.com/ndownloader/files/20498118)
Supplement: Supplementary file [file 20498118]

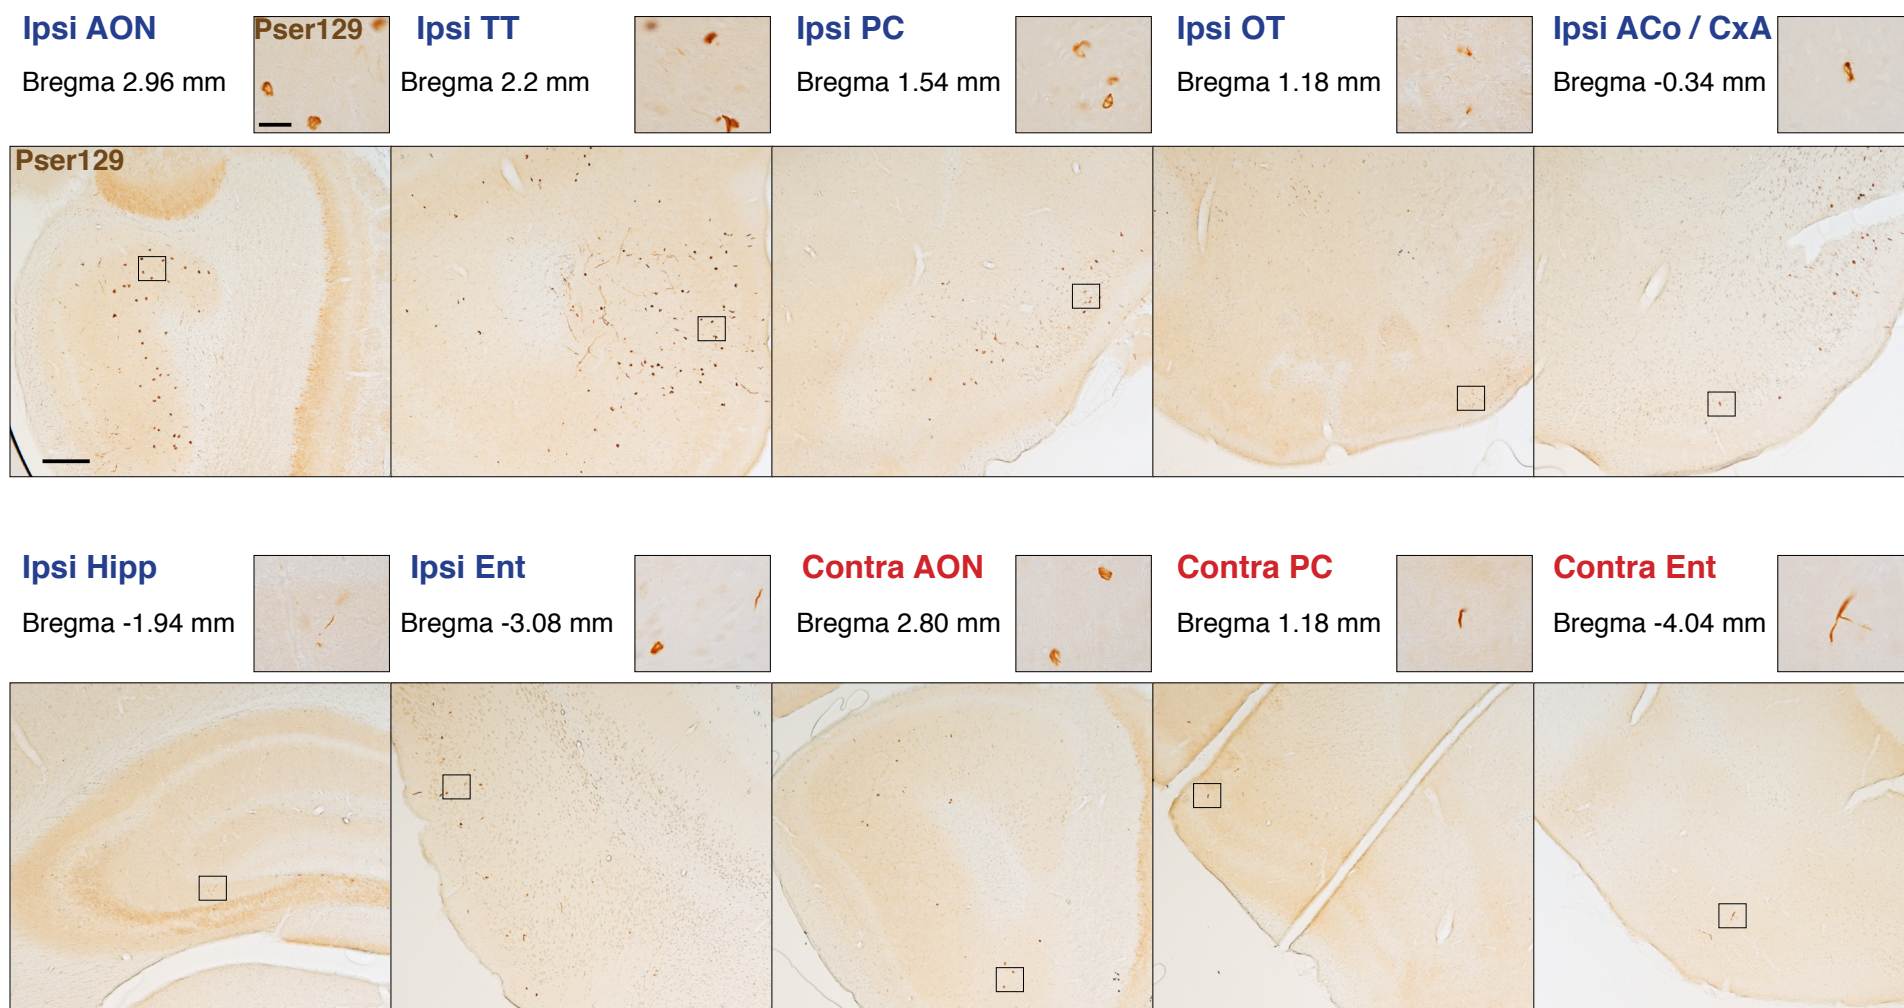

### Additional file 3: Examples of pser129-positive inclusions at high and low magnifications

Examples of photomicrographs from an animal injected with F-91 in the ipsi OB showing alpha-synuclein inclusions in some ipsilateral (legend in blue) and contralateral (legend in red) brain regions at 6 months post injection (5x and 63x magnification). Pser129-positive inclusions were detected by an antibody directed against alpha-synuclein phosphorylated on serine 129 (pser129). The area observed at 63x is identified on the low magnification image by a black rectangle. A list of brain structure abbreviations is provided as additional file 4.

Scale bar: Low magnification images: 200  $\mu$ m; High magnification images: 25  $\mu$ m
